# Supplementary material for: Temperature extremes in Europe: overview of their driving atmospheric patterns
Source: Copernicus journal article supplement (doi:10.5194/nhess-12-1671-2012), 2012-05-24
Supplement: Supplementary file 1 [file nhess-12-1671-2012-supplement.pdf]

## Temperature extremes in Europe: overview of their driving atmospheric patterns

C. Andrade<sup>1,2</sup>, S. M. Leite<sup>2</sup> and J. A. Santos<sup>2</sup>

[1]{Instituto Politécnico de Tomar, Unidade Departamental de Matemática e Física, Estrada da Serra, Quinta do Contador, 2300-313 Tomar, Portugal, c.andrade@ipt.pt}

[2]{CITAB, University of Trás-os-Montes e Alto Douro, 5000-801 Vila Real, Portugal, jsantos@utad.pt}

### Supplementary material

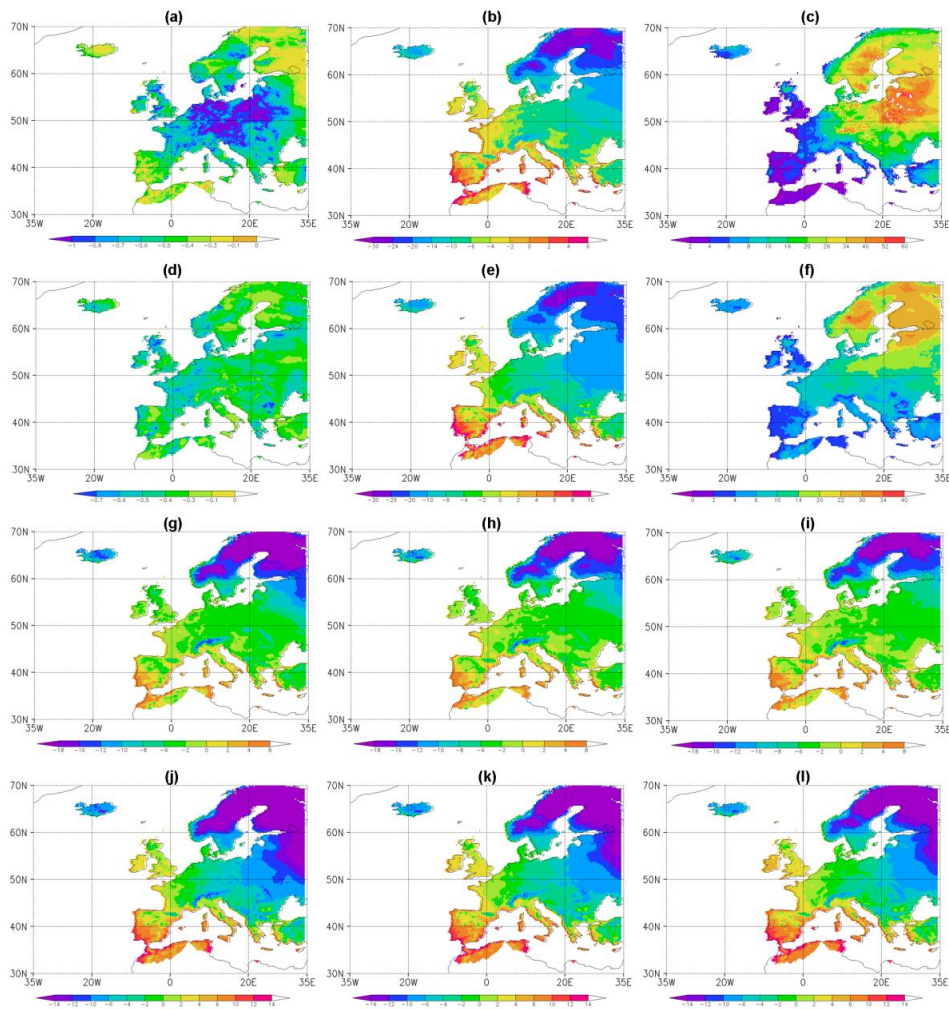

Fig. S1. Shape parameter of the GEV distribution for the spring (a) TNN and (d) TXX. Mean patterns (in °C) of the GEV distribution for (b) TNN and (e) TXX. Variance patterns (in °C<sup>2</sup>) of the GEV distribution for the spring (c) TNN and (f) TXX. Patterns of the temperatures (in °C) associated with the 5-, 10-, 20-yr return periods for the spring (g-i) TNN and (j-l) TXX.

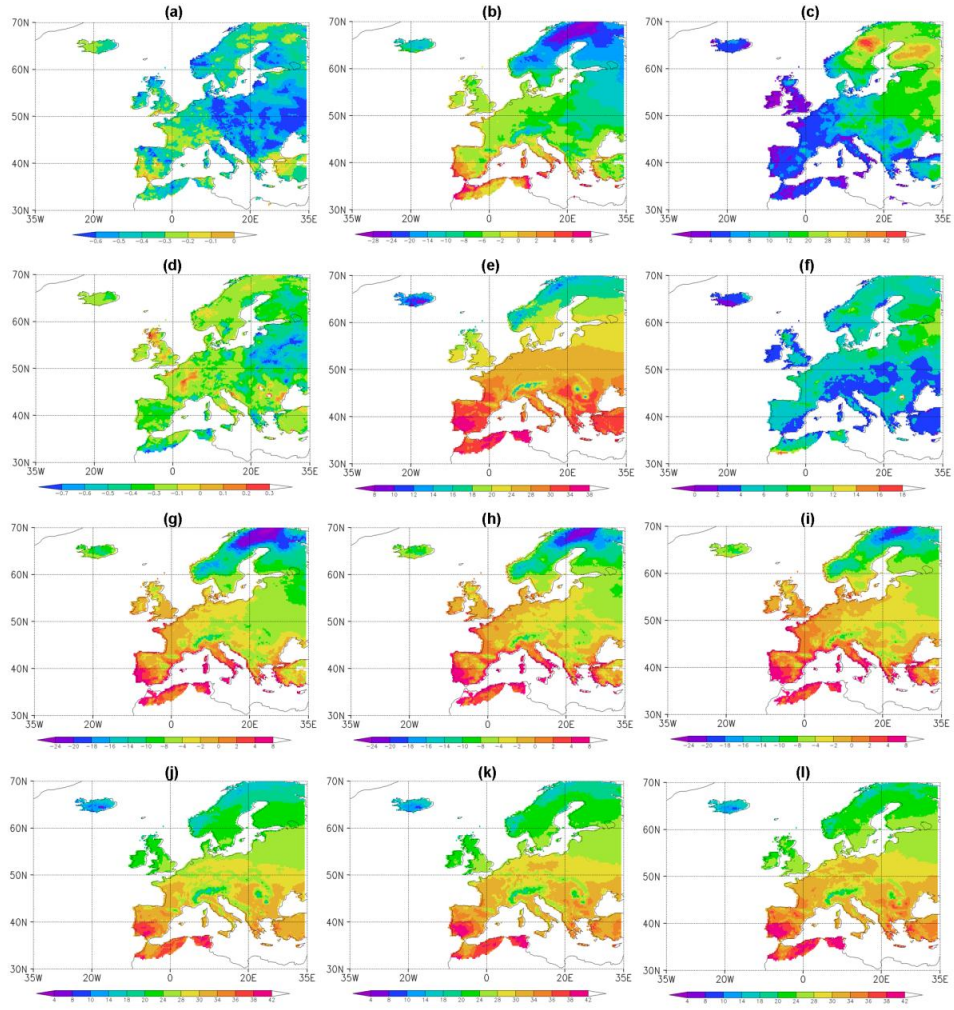

Fig. S2. As in Figure S1 but for the autumn.

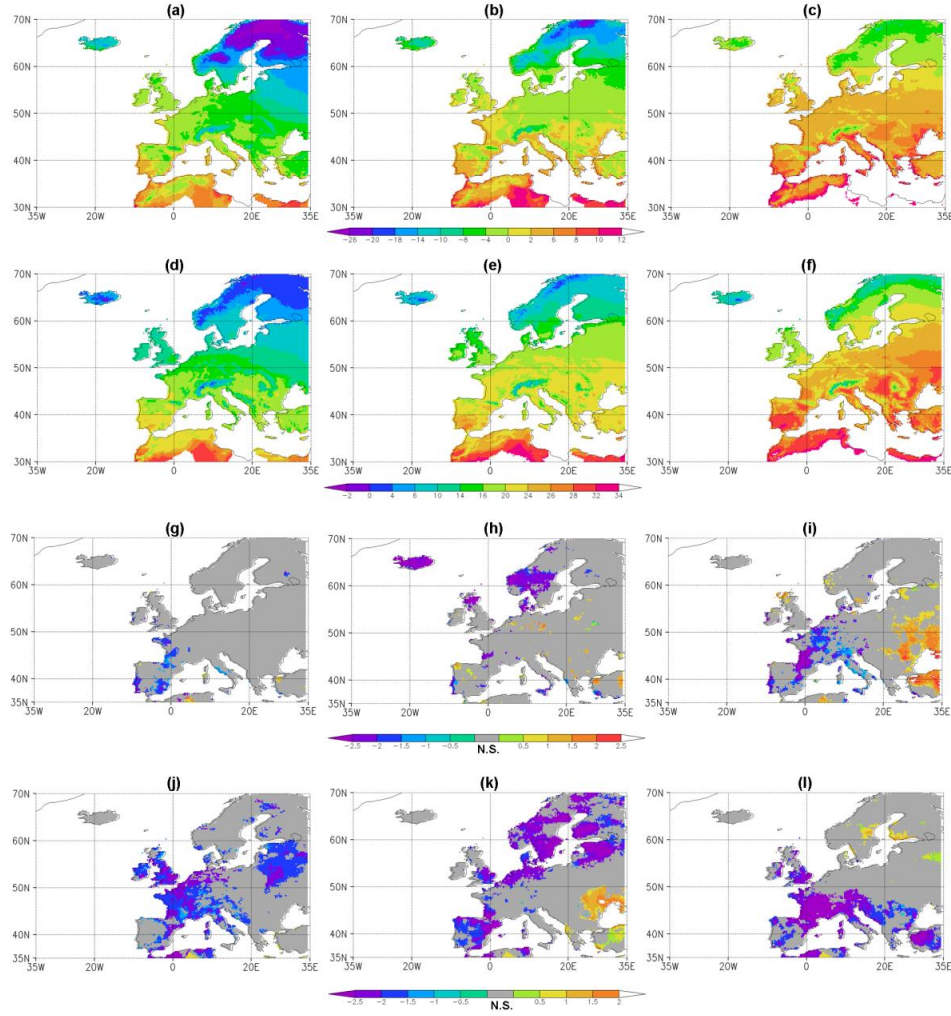

Fig. S3. Monthly mean TN10p (in °C) for (a) March, (b) April and (c) May in the period 1961-2010; (d, e, f) as in (a, b, c) but for monthly mean TX90p (in °C). The corresponding statistically significant linear trends (in days.yr<sup>-1</sup>) at the 95% confidence level (Spearman-rho test) of the monthly mean TN10p for (g) March, (h) April and (i) May; (j, k, l) as in (g, h, i) but for the monthly mean TX90p (N.S. for not significant)



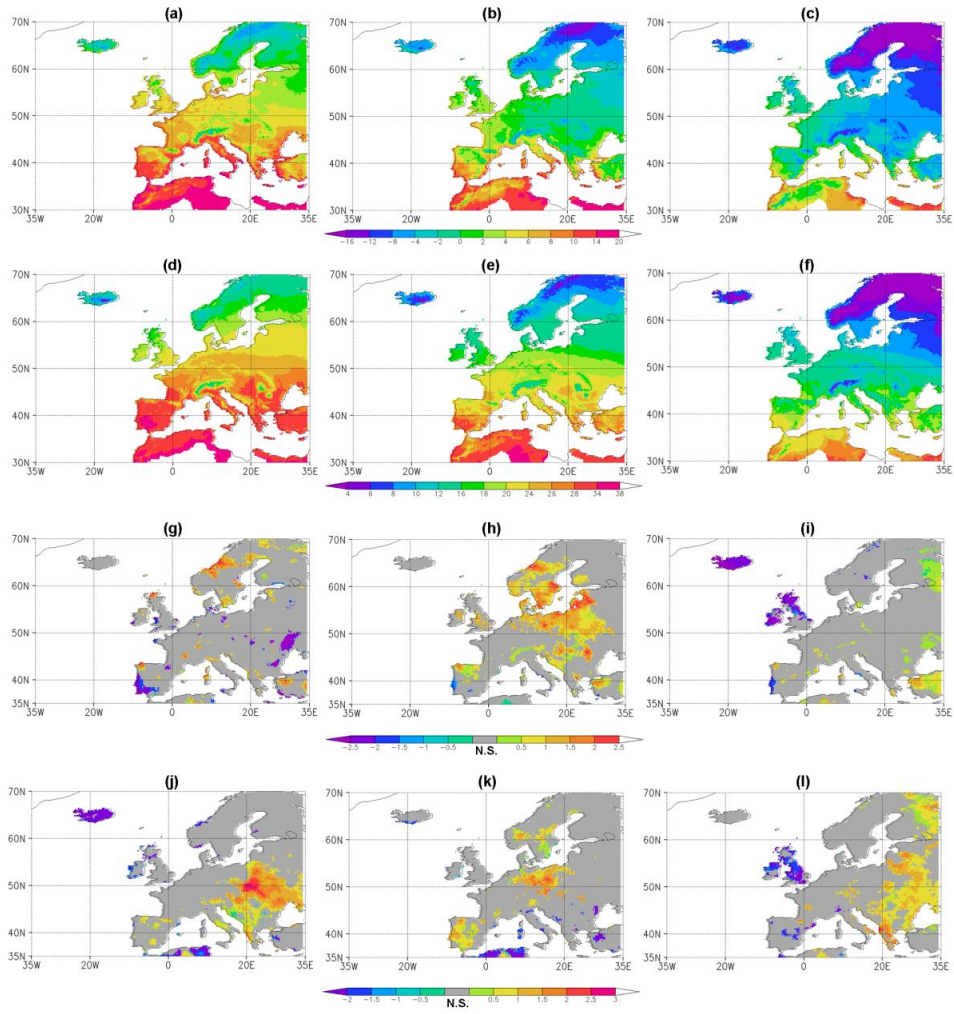

Fig. S4. Monthly mean TN10p (in °C) for (a) September, (b) October and (c) November in the period 1961-2010; (d, e, f) as in (a, b, c) but for monthly mean TX90p (in °C). The corresponding statistically significant linear trends (in days.yr<sup>-1</sup>) at the 95% confidence level (Spearman-rho test) of the monthly mean TN10p for (g) September, (h) October and (i) November; (j, k, l) as in (g, h, i) but for the monthly mean TX90p (N.S. for not significant)
